# Supplementary material
Source: publisher figshare collection journal article supplement (https://karger.figshare.com/articles/dataset/_/5173153)
Supplement: Supplementary file 1 [file 1]

(A)

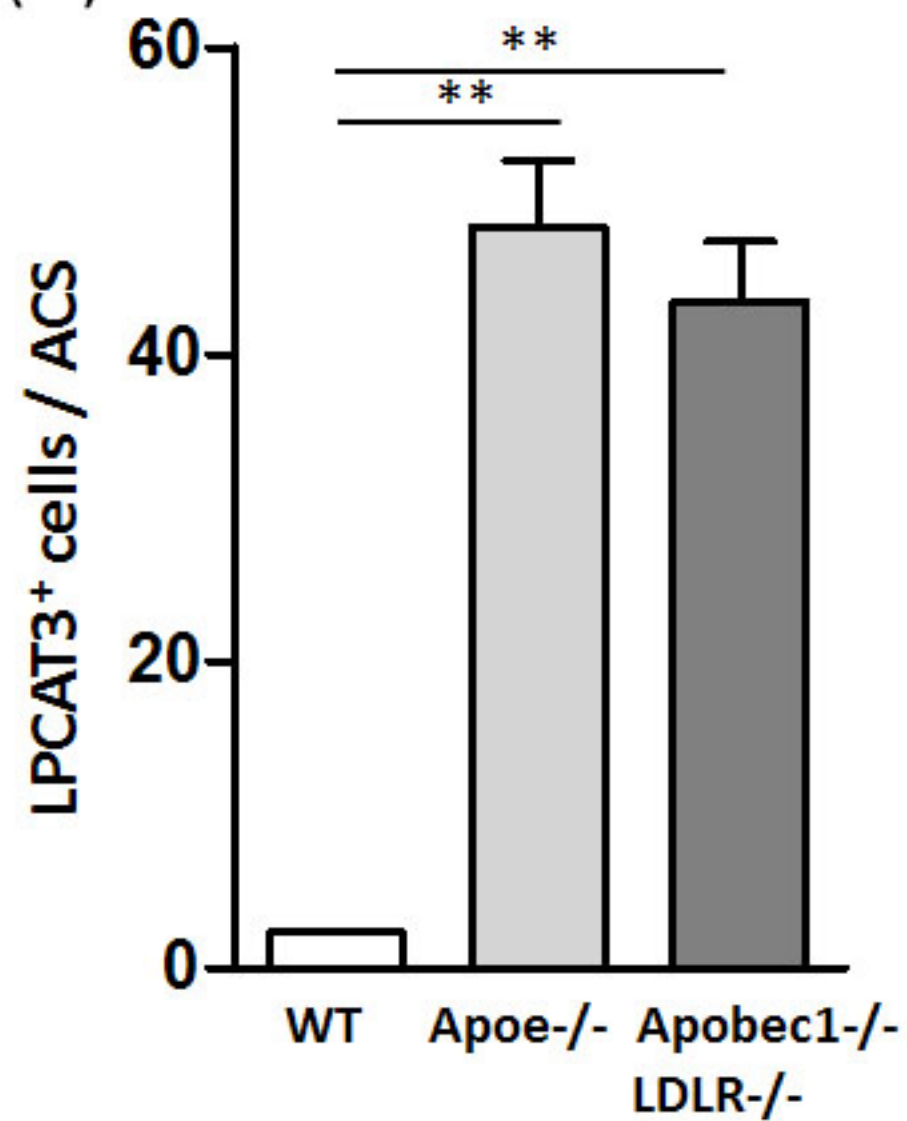

(B)

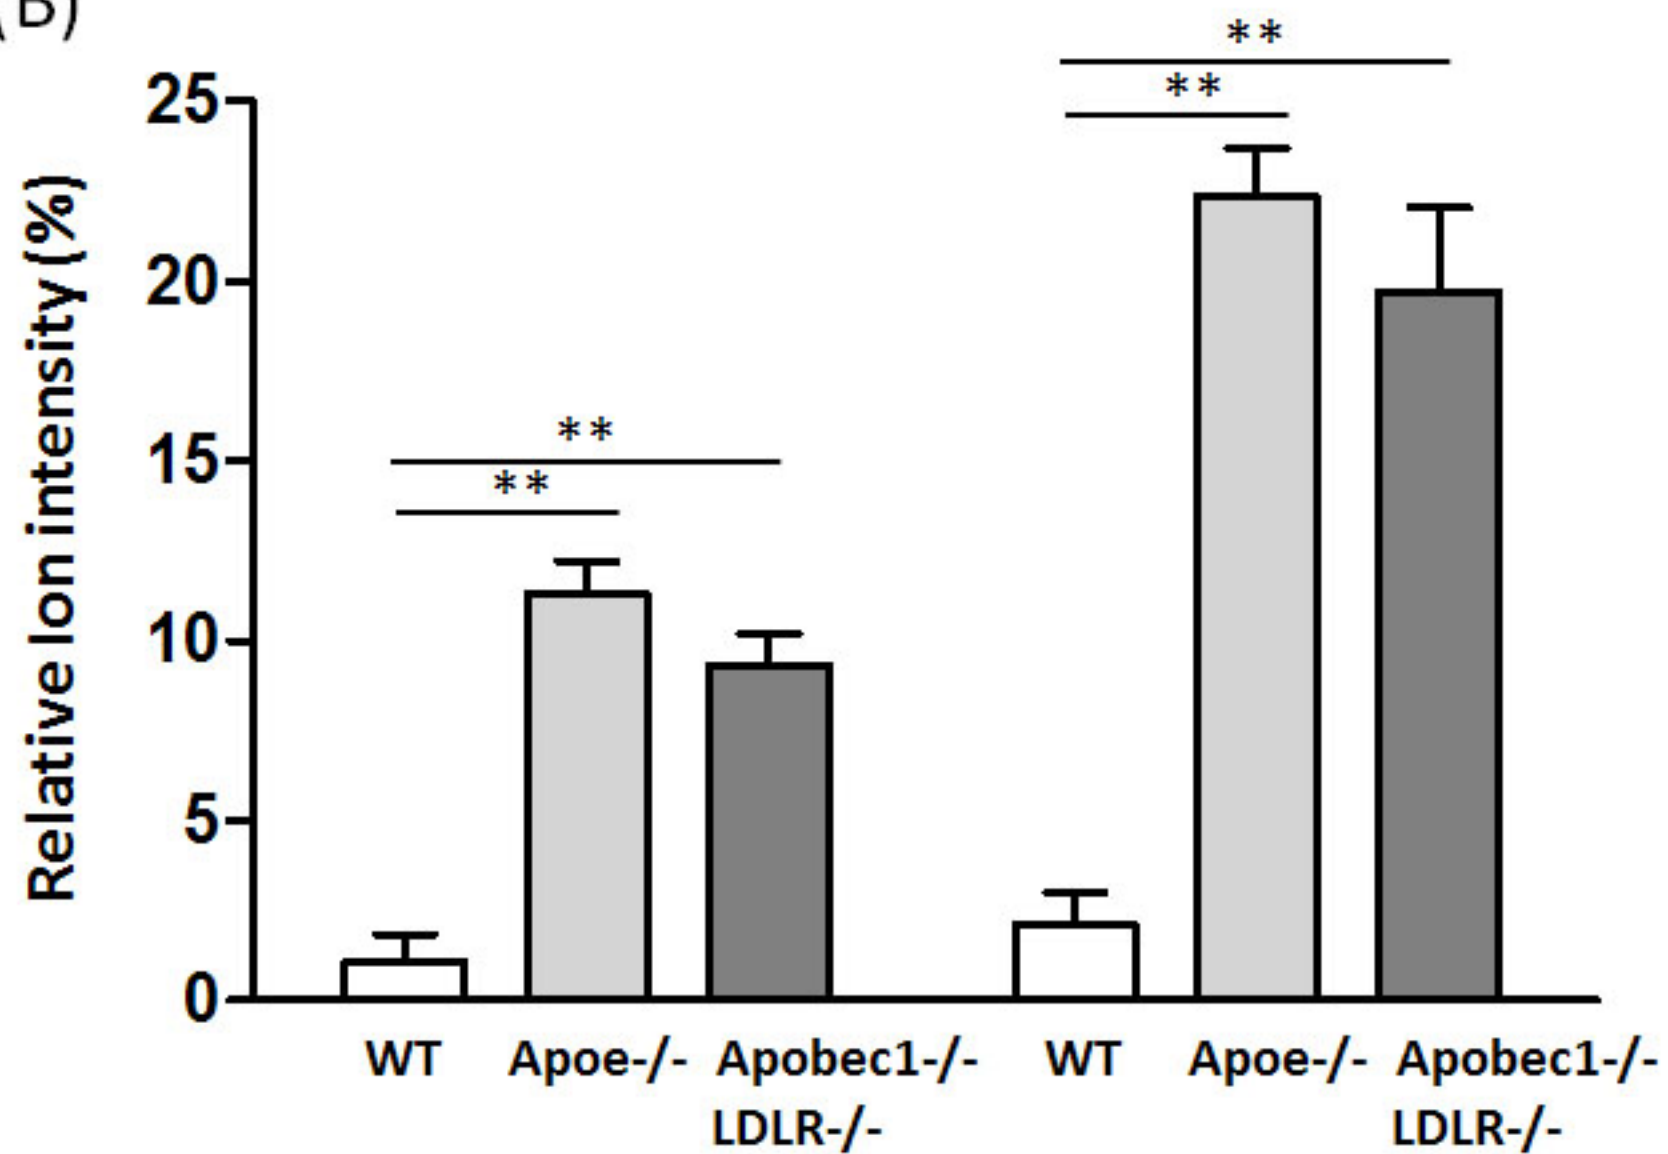

(C)

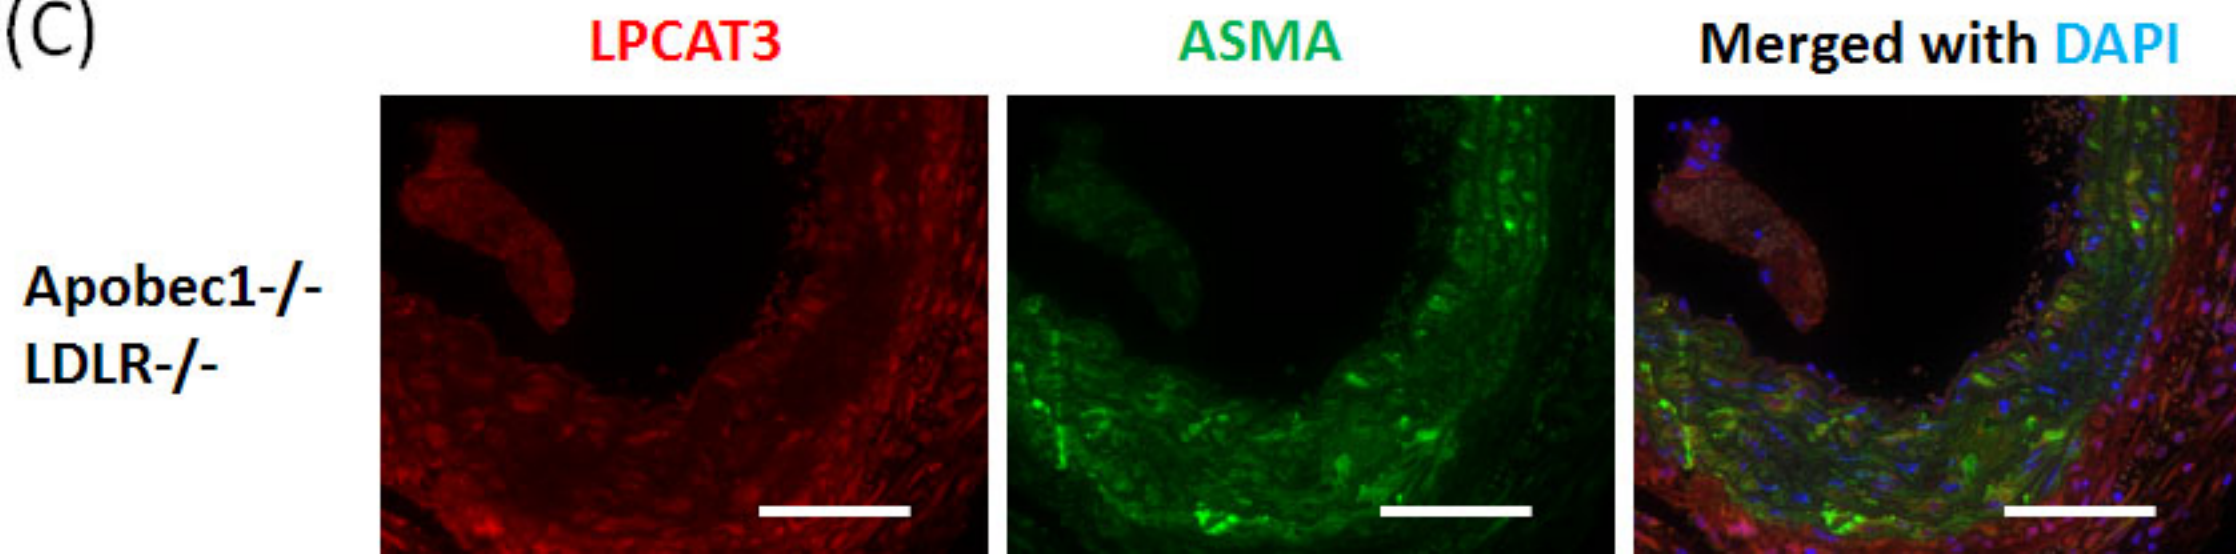

## Supplementary Fig. 2

Atherosclerosis causes arachidonyl-PC accumulation and LPCAT3 expression in mouse models of atherosclerosis (Apobec1/LDLR double-deficient mouse). (A) Mean and standard deviation of LPCAT3-positive cells per aortic cross section (ACS). The number of LPCAT3-positive cells was counted using Hybrid Cell Count BZ-H2C software. (B) Comparison of the intensity of arachidonyl-PC and LPC relative to PC (16:0/18:1). Statistical analysis was performed using a paired t-test. \*\* $p < 0.001$ . (C) LPCAT3 expression in VSMCs from animal models of atherosclerosis. LPCAT3 (red), alpha-smooth muscle cell actin, ASMA (green), and DAPI (blue) immunostaining (scale bars = 50  $\mu\text{m}$ )
