# Supplementary material
Source: publisher figshare collection journal article supplement (https://karger.figshare.com/articles/dataset/_/5173153)
Supplement: Supplementary file 2 [file 1 › 473879_sm1.pdf]

(A)

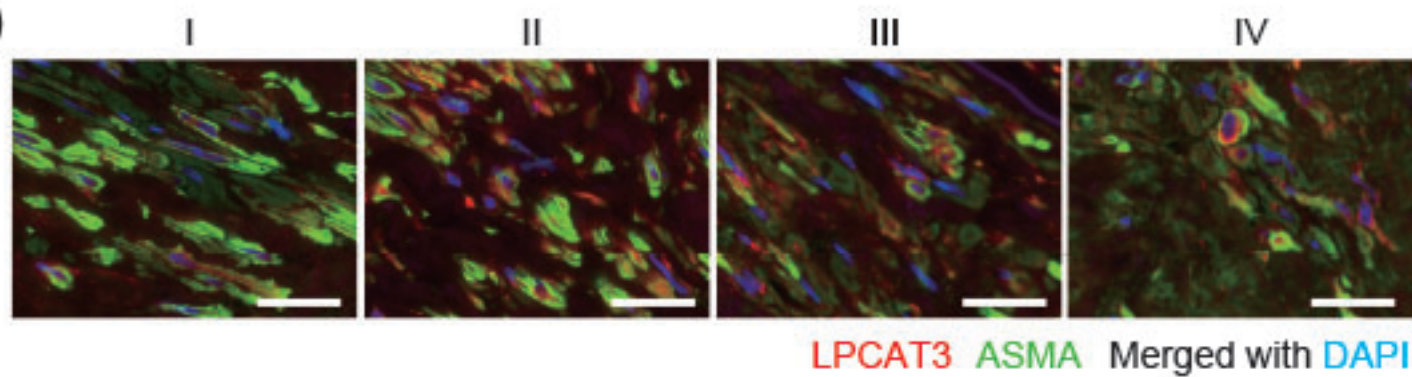

(B)

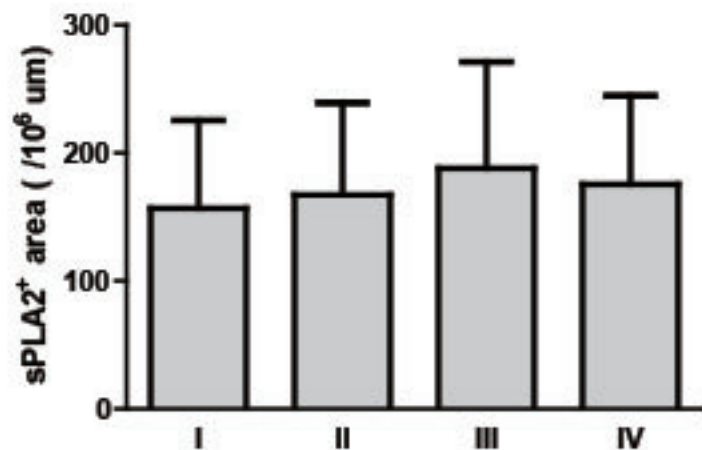

### **Supplementary Fig. 1**

Secreted phospholipase A2 (sPLA2) expression in VSMCs from atherosclerotic tissue. (A) sPLA2 (red), alpha-smooth muscle cell actin, ASMA (green), and DAPI (blue) immunostaining (scale bars = 50  $\mu\text{m}$ ). (B) The sPLA2-positive area in atherosclerotic tissue was quantitated using BZ-H2C software. Statistical analysis was performed using Dunnet's test.
